# Supplementary material for: In situ magnetic-field-assisted bioprinting process using magnetorheological bioink to obtain engineered muscle constructs
Source: Research Square preprint supplement (doi:10.21203/rs.3.rs-4859720/v1), 2024-08-14
Supplement: Supplementary file 1 [file 0670a9d9c51d71b4ad903b71.docx]

**Supporting information**

***In situ* magnetic-field-assisted bioprinting process using magnetorheological bioink to obtain engineered muscle constructs**

Hanjun Hwangbo,1,2 SooJung Chae,1 Dongryeol Ryu,3 GeunHyung Kim1,2,4,*

1Department of Precision Medicine, Sungkyunkwan University School of Medicine (SKKU-SOM), Suwon 16419, Republic of Korea

2Institute of Quantum Biophysics, Department of Biophysics, Sungkyunkwan University, Suwon, Gyeonggi-do 16419, Republic of Korea

3Department of Biomedical Science and Engineering, Gwangju Institute of Science and Technology, Gwangju, Republic of Korea.

4Biomedical Institute for Convergence at SKKU (BICS), Sungkyunkwan University, Suwon 16419, Republic of Korea

*Corresponding author. E-mail: gkimbme@skku.edu

**Supplementary tables**

**Table S1.** Biocompatibility of iron oxide-based particles.

| **Type of iron oxide particles** | ***In vitro* or *in vivo* model** | **Toxicity analysis methodology** | **Cytotoxic results** | **Ref** |
| --- | --- | --- | --- | --- |
| Bare iron oxideparticles | • PC12 cells cultured with various concentrations of iron oxide nanoparticles | • *In vitro*: 0.01~0.25 mg∙mL-1 for 72 h | • Showed cytotoxicity at 0.25 mg∙mL-1 to PC12 cells  • No signs of cytotoxicity at 0.01 mg∙mL-1 | 1 |
| • A549 cells treated with various concentrations of Fe3O4 | • *In vitro*: treated 1, 10, and 100 µg∙mL-1 for 72 h | • LDH leakage and decline in cell viability at high concentrations (100 µg∙mL-1)  • Similar LDH leakage at low concentration (1 µg∙mL-1) compared to non-treated | 2 |
| • Erythrocytes incubated with various concentrations of Fe3O4 nanoparticles  • Intravenous injection in rats for 6 d | • *In vitro*: 100, 800, and 1600 µg∙mL-1 for 24 h  • *In vivo*: 12 mg∙kg-1 intravenous injection for 6 d | • Significant damage to erythrocytes with treatment with Fe3O4 *in vitro* at high concentrations (800 and 1600 µg∙mL-1)  • Apoptosis of circulating erythrocyte *in vivo* with intravenous injection | 3 |
| • A549 cells treated with various concentrations of Fe3O4 | • *In vitro*: 10–80 µg∙mL-1 | • The iron oxide particles indicated no cytotoxic characteristics | 4 |
| • 14 d incubation of adult zebrafish | • *In vivo*: 1 and 100 ppm iron oxide incubation | • Iron oxide particles exhibited biochemical safety at 1 ppm but displayed neurobehavioral toxicity at 10 ppm | 5 |
| Iron oxide particles with Fe2O4 and MnFe2O4 core | • Mouse microglial cell line N13 treated with various iron oxide concentration  • Zebrafish embryos cultured in various iron oxide concentration | • *In vitro*: 0.1 to 100 µg∙mL-1  • *In vivo*: 0.01, 0.1, 1, 10, 100 µg∙mL-1 | • No significant cytotoxicity at 0.01 µg∙mL-1 on N13 cells *in vitro*  •No mortality or defects in the embryos exposed to various concentrations *in vivo* | 6 |
| DMSA-coated iron oxide particles | • MCF-7 cells cultured in fixed iron oxide concentration | • *In vitro*:1 - 72 h treatment of DMSA-coated Iron oxide particles (0.4 mg∙mL-1) | • MCF-7 cells proliferated without effects on cell morphology, ROS generation, and cell viability | 7 |
| AA-coated iron oxide particles | • HFF2 cell lines | • *In vitro:* 72 h treatment of AA-coated iron oxide particles  (0.049, 0.073, 0.110, 0.165, 0.248 and 0.373 mg∙mL-1) | • Biocompatible and nontoxic with the cell line HFF2 | 8 |

LDH: lactate dehydrogenase; DMSA: Dimercaptosuccinic acid; AA: amino acids

**Table S2.** Application of iron oxide-based particles in tissue engineering.

| **Target tissue** | **Materials** | **Fabrication methods** | **M-field** | **Animal model** | **Results** | **Ref.** |
| --- | --- | --- | --- | --- | --- | --- |
| Bone | • Scaffold: Calcium silicate, Fe3O4, PCL  • Cell: Wharton’s Jelly MSCs | • Cells seeded onto iron oxide-laden PCL-based composites | • Exposure to M-field for 20 min per d | N/A | • Upregulated osteogenesis-related gene expression with Fe3O4 | 9 |
| • Scaffold: Fe2O3, b-TCP, SiO2 | • Scaffolds implanted onto the femoral head | N/A | • Rat femoral head defect | • Enhanced bone mineralization and osteo-conduction with Fe2O3  • Improved vascularization | 10 |
| • Scaffold: PEG functionalized Fe2O3(500 ng∙mL-1)  • Cells: Stromal vascular fraction cells | • PEG-functionalized Fe2O3 used to form hydrogel | • Static M-field (50 mT) stimulation | • Subcutaneous implantation into nude mice | • Static magnetic fields stimulate osteo-vasculogenic properties of the cells  • Enhanced *in vivo* mineralization and vascularization | 11 |
| Muscle | • Scaffold: PCL, CNT, Fe3O4, GelMA, PEO  • Cell: C2C12 myoblast | • Coaxial electrospinning [PCL-Fe3O4-CNT (core)  and PEO (shell)]  • Magnetic fibers were cut and incorporated into GelMA hydrogel | • Static M-field (80 mT) stimulation for 10 s | • Rat tibialis anterior muscle defect | • Increased myogenic activities of C2C12 *in vitro*  • Increased muscle functionality *in vivo* | 12 |
| • Scaffold: Fe3O4, gelatin, polyurethane  • Cell: C2C12 myoblast (for myogenesis evaluation), and RAW264.7 (for immune response evaluation) | • Coaxial electrospinning [iron oxide-laden gelatin (core) and iron oxide-laden polyurethane (shell)] | • Static M-field stimulation (16 mT) for 12 h intervals | • Mouse tibialis anterior muscle defect model | • No significant production of IL-1β from RAW264.7 macrophages indicating no significant immune response  • By combining magnetic fields, the VEGF production was increased  • Enhanced muscle regeneration and angiogenesis were observed | 13 |
| • Scaffold: Collagen, magnetic nickel beads  • Cell: C2C12 myoblasts | • C2C12-laden collagen bioink placed in PDMS mold and exposed to static magnetic field | • Static M-field exposure | N/A | • High alignment of collagen fibers and cells  • Increased mechanotransduction activities in C2C12 myoblasts | 14 |
| • Scaffold: Gelatin, Fe3O4 | • Fe3O4 incorporated gelatin hydrogel injected into gastrocnemius muscles in rats | • Dynamic M-field exposure (1 Hz) 30 min every 12 h for 14 d | • Disuse atrophy model in rats | • Increased muscle regeneration and functionalities with magnetic hydrogel injection and M-field stimulation  • Iron oxide was not observed in other organs | 15 |
| Tendon | • Scaffold: GelMA, Fe3O4, CNC, PCL  • Cells: hASC | • Electrospinning of Fe3O4-loaded PCL into short magnetic fibers  • Incorporation of magnetic fibers into GelMA hydrogel, followed by submerged bioprinting into CNC bath | • Parallel neodymium magnet providing 208 mT of magnetic flux | N/A | • Alignment of magnetic fibers and hASCs  • Increased YAP/TAZ expressions  • Upregulated tenogenic differentiation of hASCs | 16 |
| Nerve | • Scaffold: Fibrin, iron oxide, chitosan  • Cell: PC12 (Rat pheochromocytoma 12) | • PC12 was seeded onto the scaffold  • Iron oxide-laden nerve guidance conduits were implanted into the sciatic nerve of the rat model | • External magnetic field | • Rat sciatic nerve defect model | • Iron oxide increased production of NGF and VEGF  • Implanted conduit exhibited accelerated motor function restoration and nerve fiber regrowth | 17 |

PCL: poly(ε-caprolactone); tdECM: tendon decellularized extracellular matrix; CNC: cellulose nanocrystals; PEG: poly(ethylene glycol); PEO: poly(ethylene oxide); CNT: carbon nanotubes; VEGF: vascular endothelial growth factor; NGF: nerve growth factor; hMSCs: human mesenchymal stem cell; hASCs: human adipose stem cells.

**Table S3.** Gene primer sequences used in the qRT-PCR analyses.

| Gene | Source | Primer sequence | |
| --- | --- | --- | --- |
| Left (5ʹ – 3ʹ) | Right (5ʹ – 3ʹ) |
| GAPDH | Homo sapiens | TTTTGCGTCGCCAGCC | TTTTGCGTCGCCAGCC |
| Piezo1 | Homo sapiens | ACTTTCCCATCAGCACTCGG | AGGGTGTAGAGCAACATGGC |
| TRPV2 | Homo sapiens | CTCACCTGAAAGCGGAGGTT | AGAGGCACCATCCTCATCCT |
| Wnt | Homo sapiens | CCGCAACTATAAGAGGCGGT | AAGGTTCATGAGGAAGCGCA |
| b-catenin | Homo sapiens | GGCTACTCAAGCTGATTTGATGG | GCAGGAATGCCTCCAGACTT |
| YAP | Homo sapiens | CCCTCGTTTTGCCATGAACC | AATTCAGTCTGCCTGAGGGC |
| TAZ | Homo sapiens | AGCCCTTTCTAACCTGGCTG | TGACTAATGCTGCTGCTGCT |
| Myog | Homo sapiens | TCCATCGTGGACAGCATCAC | ACAGGAGACCTTGGTCGGAT |
| MHC | Homo sapiens | TCCTGCTTTAAAAAGCTCCAAGAA | ACGCTTGGTGTTCACAGTCT |
| TnT | Homo sapiens | TCAATGTGCTCTACAACCGCA | ACCCTTCCCAGCCCCC |
| Myh1 | Homo sapiens | TCCTGCTTTAAAAAGCTCCAAGAA | ACGCTTGGTGTTCACAGTCT |
| Myod1 | Homo sapiens | CGACGGCATGATGGACTACA | CCCTCAAGGTTCAGCTCTGG |

**Supplementary figures**


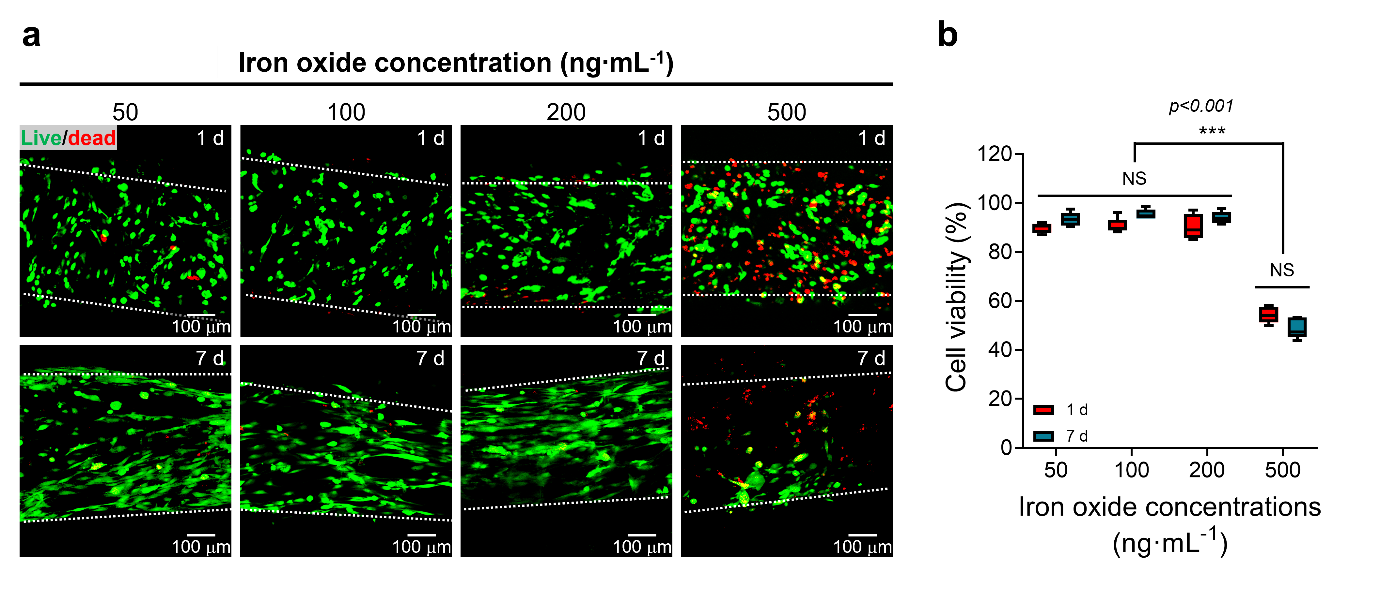


**Supplementary Fig. S1 | Toxicity evaluation of various concentrations of iron oxide particles in magnetorheological bioink.** (**a**) Live/dead images and (**b**) measured cell viability of hASCs cultured in bioconstructs containing various iron oxide concentrations (50 ~ 500 ng∙mL-1).


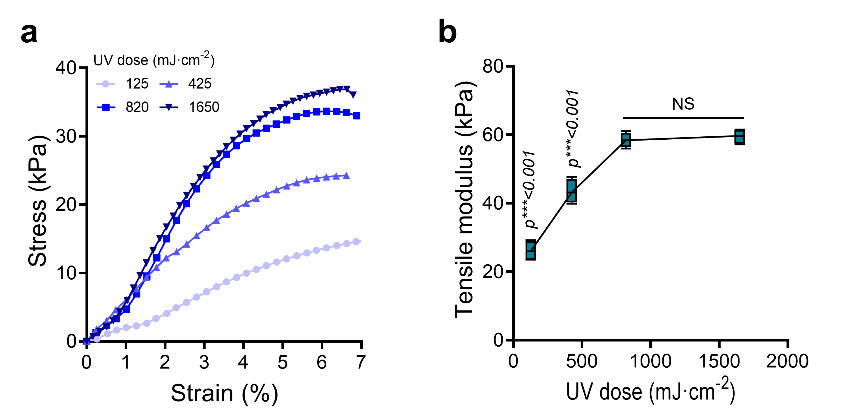


**Supplementary Fig. S2 | Mechanical properties characterization of bioconstructs fabricated with various UV doses.** (**a**)Stress-strain curves and (**b**) calculated tensile modulus of bioconstructs fabricated using *in situ* M-field bioprinting with various UV conditions (125 ~ 1650 mJ∙cm-2).


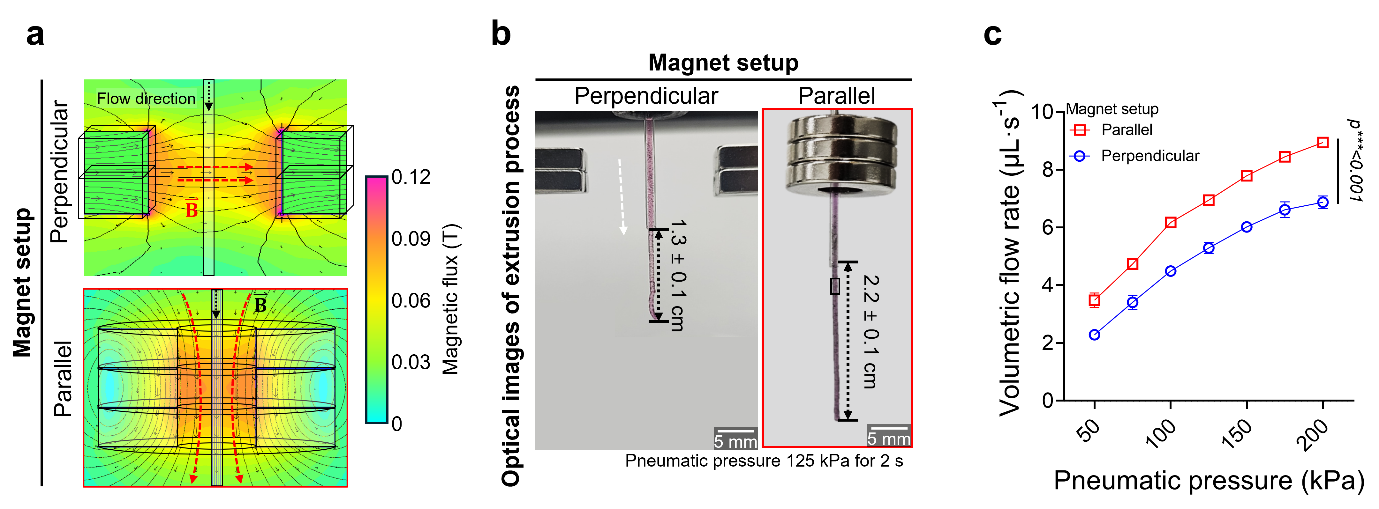


**Supplementary Fig. S3 | Comparison between parallel and perpendicular magnetic fields.** (**a**) Magnetic simulation distribution around the nozzle using magnet setup to provide perpendicular and parallel magnetic flux with respect to the bioink flow direction. (**b**) Optical images of the extruded bioink for 2 s under 125 kPa of pneumatic pressure and (**c**) measured volumetric flow rate using two magnet setups under various pneumatic pressures (50 ~ 200 kPa).

**
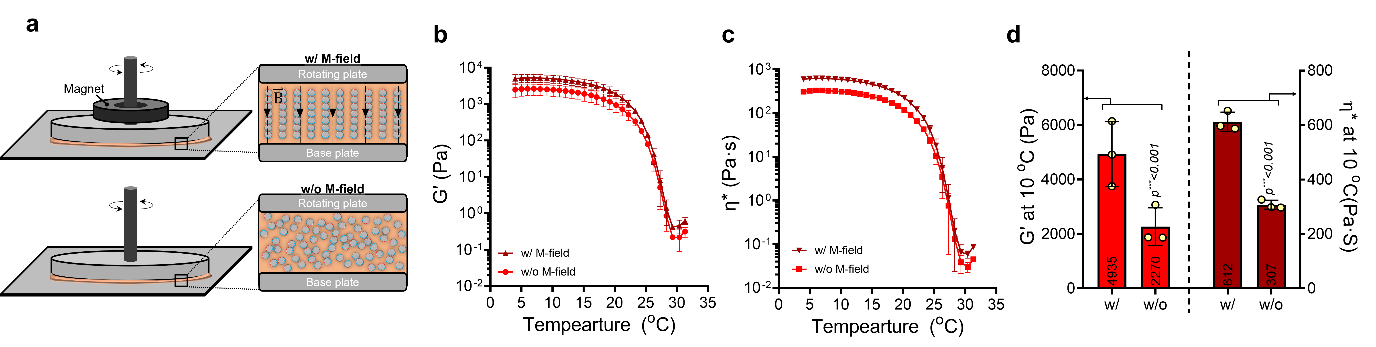
**

**Supplementary Fig. S4 |** (a) Schematical diagram of rheological evaluation process using w/ or w/o M-field. Rheological properties [(b) storage modulus (G’) and (c) complex viscosity (η*)] of the magnetorheological bioink measured using temperature sweep (4 ~ 32 oC). (d) G’ and η* values of the magnetorheological bioink at 10 oC.


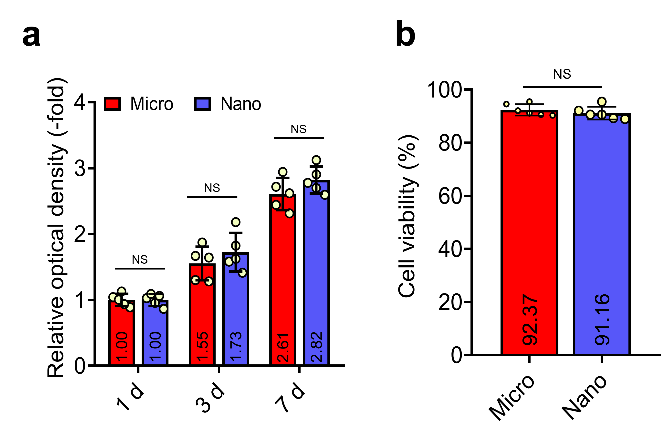


**Supplementary Fig. S5 | Biological effects of nano- and micro-sized iron oxide particles.** (**a**) The optical density of MTT cell proliferation assay at 1, 3, and 7 d, and (**b**) calculated cell viability of hASCs cultured in bioconstructs incorporated with micro- or nano-sized iron oxide particles.


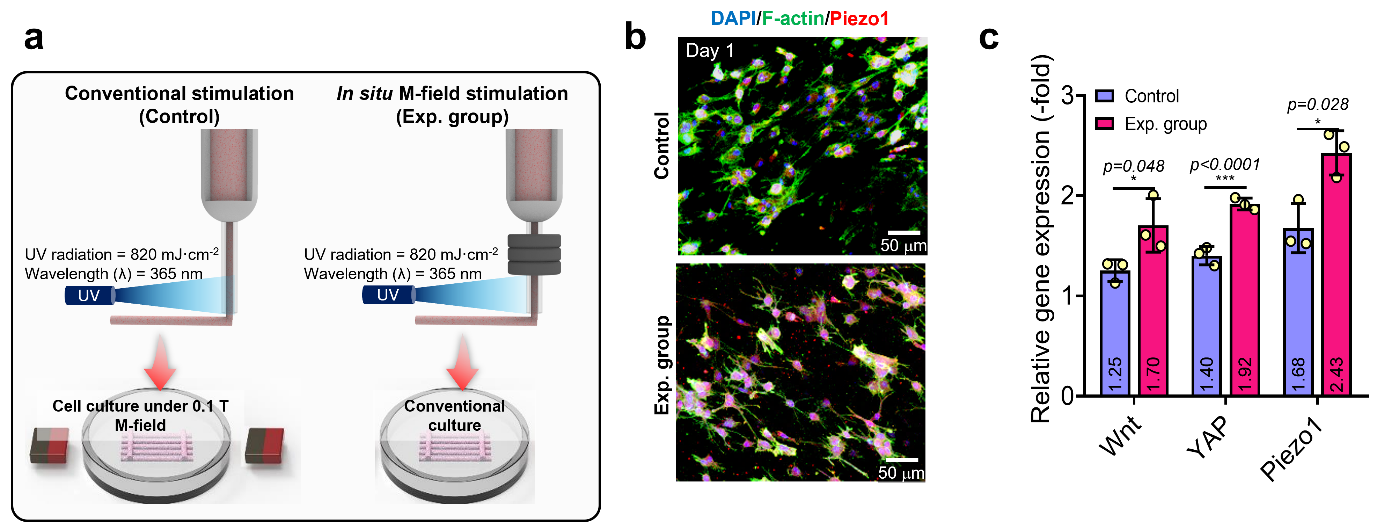


**Supplementary Fig. S6 | Comparison between *in situ* M-field assisted bioprinting and conventional M-field stimulation.** (**a**) A schematic diagram demonstrating conventional magnetic stimulation (Control) and *in situ* M-field stimulation (GIOM, Exp. group) and (**b**) DAPI/F-actin/piezo1 images of hASCs loaded into bioink and cultured in Control and Exp. bioconstructs for 1 d. (**c**) Relative gene expressions of Wnt, YAP, and Piezo1 in the Control and Exp. Groups after 72 h of culture. The gene expressions are normalized to the expressions in cells on bioink before printing.

**Reference**

1. Marcus M*, et al.* Iron oxide nanoparticles for neuronal cell applications: uptake study and magnetic manipulations. *J. Nanobiotechnology* **14**, 1-12 (2016).

2. Watanabe M*, et al.* Effects of Fe3O4 magnetic nanoparticles on A549 cells. *Int. J. Mol. Sci.* **14**, 15546-15560 (2013).

3. Ran Q*, et al.* Eryptosis indices as a novel predictive parameter for biocompatibility of Fe3O4 magnetic nanoparticles on erythrocytes. *Sci. Rep.* **5**, 16209 (2015).

4. Shen S*, et al.* Magnetic nanoparticle clusters for photothermal therapy with near-infrared irradiation. *Biomaterials* **39**, 67-74 (2015).

5. Malhotra N*, et al.* Ecotoxicity assessment of Fe3O4 magnetic nanoparticle exposure in adult zebrafish at an environmental pertinent concentration by behavioral and biochemical testing. *Nanomaterials* **9**, 873 (2019).

6. Caro C, Egea-Benavente D, Polvillo R, Royo JL, Leal MP, García-Martín ML. Comprehensive toxicity assessment of PEGylated magnetic nanoparticles for in vivo applications. *Colloids Surf. B Biointerfaces* **177**, 253-259 (2019).

7. Calero M*, et al.* Characterization of interaction of magnetic nanoparticles with breast cancer cells. *J. Nanobiotechnology* **13**, 1-15 (2015).

8. Nosrati H, Salehiabar M, Attari E, Davaran S, Danafar H, Manjili HK. Green and one‐pot surface coating of iron oxide magnetic nanoparticles with natural amino acids and biocompatibility investigation. *Appl. Organomet. Chem.* **32**, e4069 (2018).

9. Kao C-Y*, et al.* Synergistic effect of static magnetic fields and 3D-printed iron-oxide-nanoparticle-containing calcium silicate/poly-ε-caprolactone scaffolds for bone tissue engineering. *Cells* **11**, 3967 (2022).

10. Bose S, Banerjee D, Robertson S, Vahabzadeh S. Enhanced in vivo bone and blood vessel formation by iron oxide and silica doped 3D printed tricalcium phosphate scaffolds. *Ann. Biomed. Eng.* **46**, 1241-1253 (2018).

11. Filippi M*, et al.* Magnetic nanocomposite hydrogels and static magnetic field stimulate the osteoblastic and vasculogenic profile of adipose-derived cells. *Biomaterials* **223**, 119468 (2019).

12. Wang L*, et al.* Injectable remote magnetic nanofiber/hydrogel multiscale scaffold for functional anisotropic skeletal muscle regeneration. *Biomaterials* **285**, 121537 (2022).

13. Hu X*, et al.* Magnetic nanofibrous scaffolds accelerate the regeneration of muscle tissue in combination with extra magnetic fields. *Int. J. Mol. Sci.* **23**, 4440 (2022).

14. Shi N*, et al.* A 3D, magnetically actuated, aligned collagen fiber hydrogel platform recapitulates physical microenvironment of myoblasts for enhancing myogenesis. *Small Methods* **5**, 2100276 (2021).

15. Chang L*, et al.* An Injectable, biodegradable magnetic hydrogel system for exogenous promotion of muscle mass and regeneration. *Chem Eng J* **420**, 130398 (2021).

16. Pardo A*, et al.* Magnetically‐assisted 3D bioprinting of anisotropic tissue‐mimetic constructs. *Adv. Funct. Mater.* **32**, 2208940 (2022).

17. Hong J*, et al.* Magnetic fibrin nanofiber hydrogel delivering iron oxide magnetic nanoparticles promotes peripheral nerve regeneration. *Regen. Biomater.* rbae075 (2024).
